# Supplementary material for: SMAD4 Expression in Renal Cell Carcinomas Correlates With a Stem-Cell Phenotype and Poor Clinical Outcomes
Source: PubMed Central journal article supplement (PMC8127783; doi:10.3389/fonc.2021.581172), 2021-05-03
Supplement: DataSheet_1.pdf [file DataSheet_1.pdf]

## Supplementary Appendix, S1.

### The standard curve was plotted for cell invasion assay

We performed a cell invasion assay to evaluate the invasive properties of PCs and SDCs. Using the manufacturer's recommendations, a standard curve was generated and best-fit line plotted from the point zero based on the linear equation and regression coefficient or R<sup>2</sup> (Coefficient of determination). The average of all wells for each condition was calculated and background was subtracted from averages. The trend line equation was used to determine the number of cells present in each well; for the equation,  $y = mx + b$ ,  $y$  value was replaced with relative fluorescence units (RFU), and solved for  $X$  (number of cells per well). The data used for plotting the standard curve is provided in the following supplemental table1 (Table S1) and Figure S1 shows the standard curve.

| <b>Table S1:</b> The data used for plotting the standard curve |              |            |               |
|----------------------------------------------------------------|--------------|------------|---------------|
| Cells/Well                                                     | Average RFU* | Background | Corrected RFU |
| 50000                                                          | 15663        | -236       | 15427         |
| 25000                                                          | 8434         | -236       | 8198          |
| 10000                                                          | 4634         | -236       | 4398          |
| 5000                                                           | 2448         | -236       | 2212          |
| 2500                                                           | 1412         | -236       | 1176          |
| 1000                                                           | 722          | -236       | 486           |
| 0                                                              | 236          |            |               |
| * RFU indicates Relative Fluorescence Units                    |              |            |               |

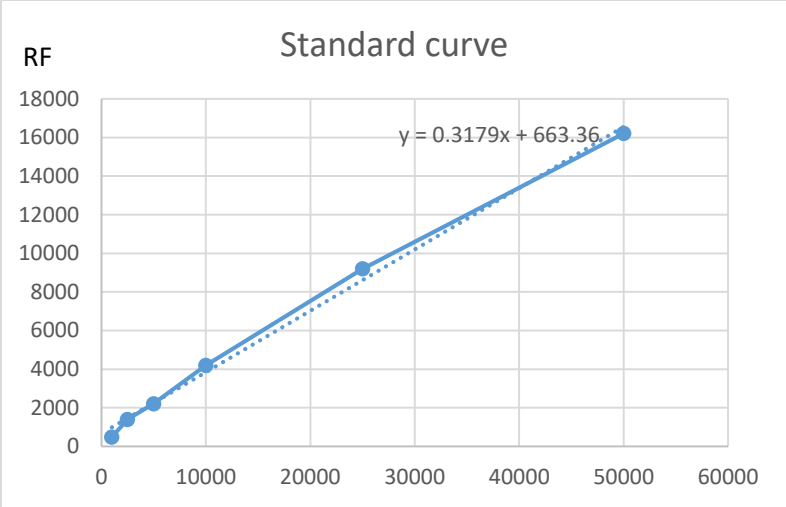

**FigureS1.** The graph shows a cell invasion standard curve. ACHN cells were harvested, diluted, incubated for one hour with Calcein-AM, and assayed for fluorescence. The trend line and line equation were included on the graph.
