# Supplementary material for: SMAD4 Expression in Renal Cell Carcinomas Correlates With a Stem-Cell Phenotype and Poor Clinical Outcomes
Source: PubMed Central journal article supplement (PMC8127783; doi:10.3389/fonc.2021.581172), 2021-05-03
Supplement: Table_1.pdf [file Table_1.pdf]

The PCR primers are listed in supporting information Supplementary Table 2 (Table S2).

| <b>Table S2. Primers sequences for quantitative Real-time PCR (qRT-PCR)</b> |                  |                                                         |                                   |
|-----------------------------------------------------------------------------|------------------|---------------------------------------------------------|-----------------------------------|
| <b>Genes groups</b>                                                         | <b>Gene name</b> | <b>Primer Sequence (5' → 3')</b>                        | <b>Product size base pair(bp)</b> |
| Housekeeping gene                                                           | GAPDH            | F: CATGAGAAGTATGACAACAGCCT<br>R: AGTCCTTCCACGATACCAAAGT | 113                               |
| Stemness genes                                                              | OCT4             | F: GTGGAGAGCAACTCCGATG<br>R:TGCAGAGCTTTGATGTCCTG        | 121                               |
|                                                                             | SOX2             | F: AATGGGAGGGGTGCAAAAGAGG<br>R: GTGAGTGTGGATGGGATTGGTG  | 143                               |
|                                                                             | Nanog            | F: AGCTACAAACAGGTGAAGAC<br>R: GGTGGTAGGAAGAGTAAAGG      | 145                               |
|                                                                             | Klf4             | F: CCTCGCCTTACACATGAAGAG<br>R: CATCGGGAAGACAGTGTGAAA    | 108                               |
|                                                                             | C-MYC            | F: ACACATCAGCACAACACTACG<br>R: CGCCTCTTGACATTCTCC       | 161                               |
|                                                                             | Lin28            | F: CTTTGCCTTCGGACTTCTC<br>R: AACTGCTGGTTGGACACG         | 100                               |
|                                                                             | Nestin           | F: AGAGAGCGTAGAGGCAGTAA<br>R: GGTGCTTGAGTTTCTGGAGAT     | 108                               |
|                                                                             | Rex1             | F: TTTACGTTTGGGAGGAGG<br>R: GTGGTCAGCTATTCAGGAG         | 150                               |
| EMT genes                                                                   | Snail1           | F: CCAGAGTTTACCTTCCAGCA<br>R: GATGAGCATTGGCAGCGA        | 101                               |
|                                                                             | Snail2           | F: AACTACAGCGAACTGGACAC<br>R: GGATCTCTGGTTGTGGTATGAC    | 91                                |
|                                                                             | E-cadherin       | F: CAGGAGTCATCAGTGTGGT<br>R: GGAGGATTATCGTTGGTGTGTCAG   | 151                               |
|                                                                             | N-cadherin       | F: GCCCAAGACAAAGAGACCC<br>R: CTGCTGACTCCTTCACTGAC       | 94                                |

|                       |          |                                                          |     |
|-----------------------|----------|----------------------------------------------------------|-----|
|                       | Twist1   | F: TTCTCGGTCTGGAGGATGGAG<br>R: ACGCCCTGTTTCTTTGAATTTGG   | 228 |
|                       | Twist2   | F: AGCGACGAGATGGACAATAAG<br>R: TAGTGGGAGGCGGACAT         | 116 |
|                       | Zeb1     | F: CTTCTCACACTCTGGGTCTTATTC<br>R: CGTTCTTCCGCTTCTCTCTTAC | 75  |
|                       | Zeb2     | F: GAGAAAGTACCAGCGGAAACA<br>R: AGGAGTCGGAGTCTGTCATATC    | 98  |
|                       | Vimentin | F: TCTACGAGGAGGAGATGCGG<br>R: GGTC AAGACGTGCCAGAGAC      | 213 |
| Angiogenesis genes    | VEGFA    | F: GCTTACTCTCACCTGCTTCTG<br>R: CTGTCATGGGCTGCTTCTT       | 97  |
|                       | EGF      | F: CTTGTCATGCTGCTCCTCCTG<br>R: TGC GACTCCTCACATCTCTGC    | 118 |
| TGFβ1                 | TGFβ1    | F: AACCCACAACGAAATCTATGAC<br>R: TAACTTGAGCCTCAGCAGAC     | 142 |
| ABC transporter genes | ABCG2    | F: TTCCACGATATGGATTTACGG<br>R: GTTTCCTGTTGCATTGAGTCC     | 83  |
|                       | ABCB1    | F: GTTCAGGTGGCTCTGGATAAG<br>R: AGCGATGACGTCAGCATTAC      | 93  |
|                       | ABCC1    | F: CGCCTTCGCTGAGTTCCT<br>R: TGCGGTGCTGTTGTGGTG           | 217 |
| SMAD4                 | SMAD4    | F: TGATGACCTTCGTCGCTTAT<br>R: TGATGCTCTGTCTTGGGTAATC     | 148 |
| miR-204               | miR-204  | -                                                        | -   |
