# Supplementary material for: SMAD4 Expression in Renal Cell Carcinomas Correlates With a Stem-Cell Phenotype and Poor Clinical Outcomes
Source: PubMed Central journal article supplement (PMC8127783; doi:10.3389/fonc.2021.581172), 2021-05-03
Supplement: Table_2.pdf [file Table_2.pdf]

**Table S3.** The association between nuclear SMAD4 expression and clinicopathological parameters in three subtypes of RCC

|                                      |                               | Expression of SMAD4             |                |                            |
|--------------------------------------|-------------------------------|---------------------------------|----------------|----------------------------|
|                                      |                               | Nuclear <i>H-Score</i><br>(N %) |                | * <i>P</i><br><i>value</i> |
| Patient and<br>tumor characteristics | Total<br>No.Cases<br>209(N %) | Low<br>(≤200)                   | High<br>(200<) |                            |
| <b>Age (y)</b>                       |                               |                                 |                | <b>0.046</b>               |
| ≤55.0                                | 102(48.8)                     | 93(44.5)                        | 9(4.3)         |                            |
| >55.0                                | 107(51.2)                     | 87(41.6)                        | 20(9.6)        |                            |
| <b>Sex</b>                           |                               |                                 |                | 0.671                      |
| Male                                 | 180(67.5)                     | 120(57.4)                       | 60(28.7)       |                            |
| Female                               | 29(32.5)                      | 21(10.0)                        | 8(3.8)         |                            |
| <b>RCC subtypes</b>                  |                               |                                 |                | <b>0.034</b>               |
| ccRCC                                | 158(75.6)                     | 132(63.2)                       | 26(12.4)       |                            |
| ChRCC                                | 17(8.1)                       | 17(8.1)                         | 0(0.0)         |                            |
| pRCC                                 | 34(16.3)                      | 31(14.8)                        | 3(1.4)         |                            |
| <b>Tumor size(cm)</b>                |                               |                                 |                | 0.155                      |
| <4                                   | 43(20.6)                      | 33(15.8)                        | 10(4.8)        |                            |
| 4-7                                  | 72(34.4)                      | 65(31.3)                        | 7(3.3)         |                            |
| 7-10                                 | 50(23.9)                      | 42(20.1)                        | 8(3.8)         |                            |
| >10                                  | 44(21.1)                      | 40(19.1)                        | 4(1.9)         |                            |
| <b>Tumor Stage</b>                   |                               |                                 |                | 0.369                      |
| I/II                                 | 85(81.8)                      | 71(34.0)                        | 14(6.7)        |                            |
| III/IV                               | 124(18.2)                     | 109(52.2)                       | 15(7.2)        |                            |
| <b>Nuclear Grade</b>                 |                               |                                 |                | 0.542                      |
| I/II                                 | 116(60.4)                     | 97(50.5)                        | 19(9.9)        |                            |
| III/IV                               | 76 (39.6)                     | 66(34.4)                        | 10(5.2)        |                            |
| <b>Renal pelvis involvement</b>      |                               |                                 |                | <b>0.04</b>                |
| Yes                                  | 188(90.0)                     | 165(78.9)                       | 23(11.0)       |                            |
| No                                   | 21(10.0)                      | 15(7.2)                         | 6(2.9)         |                            |

|  |  |  |  |  |
|--|--|--|--|--|
|  |  |  |  |  |
|--|--|--|--|--|

\* Significances are based on Pearson Chi-square test  
Values in bold are statistically significant.  
ccRCC indicates clear cell Renal Cell Carcinoma; ChRCC, chromophob Renal Cell Carcinoma and pRCC, papillary Renal Cell Carcinoma  
H-score, histological score
