# Supplementary material for: SMAD4 Expression in Renal Cell Carcinomas Correlates With a Stem-Cell Phenotype and Poor Clinical Outcomes
Source: PubMed Central journal article supplement (PMC8127783; doi:10.3389/fonc.2021.581172), 2021-05-03
Supplement: Table_3.pdf [file Table_3.pdf]

**Table S4. Survival table of patients with RCC (Renal Cell Carcinoma) and ccRCC (clear cell Renal Cell Carcinoma).**

|                                      | Year                                 | 1                                   | 2  | 3  | 4  | 5  | 6  | 7  | 8  | 9  |
|--------------------------------------|--------------------------------------|-------------------------------------|----|----|----|----|----|----|----|----|
| RCC patients                         | Low nuclear SMAD4 expression (N=100) |                                     |    |    |    |    |    |    |    |    |
|                                      | N of cumulative Events (censored)    | 10                                  | 12 | 13 | 13 | 13 | 13 | 16 | 14 | 14 |
|                                      | N.at risk                            | 88                                  | 76 | 64 | 52 | 40 | 28 | 14 | 4  | 0  |
|                                      | High nuclear SMAD4 expression (N=24) |                                     |    |    |    |    |    |    |    |    |
|                                      | N of cumulative Events (censored)    | 7                                   | 8  | -  | -  | -  | -  | -  | -  | -  |
|                                      | N.at risk                            | 12                                  | 0  |    |    |    |    |    |    |    |
|                                      | ccRCC patients                       | Low nuclear SMAD4 expression (N=76) |    |    |    |    |    |    |    |    |
| N of cumulative Events (censored)    |                                      | 8                                   | 9  | 9  | 9  | 10 | 10 | 10 | -  | -  |
| N.at risk                            |                                      | 64                                  | 52 | 40 | 28 | 16 | 4  | 0  | -  | -  |
| High nuclear SMAD4 expression (N=22) |                                      |                                     |    |    |    |    |    |    |    |    |
| N of cumulative Events (censored)    |                                      | 7                                   | 8  | -  | -  | -  | -  | -  | -  | -  |
| N.at risk                            |                                      | 10                                  | 0  | -  | -  | -  | -  | -  | -  | -  |
