# Supplementary material for: SMAD4 Expression in Renal Cell Carcinomas Correlates With a Stem-Cell Phenotype and Poor Clinical Outcomes
Source: PubMed Central journal article supplement (PMC8127783; doi:10.3389/fonc.2021.581172), 2021-05-03
Supplement: Table_4.pdf [file Table_4.pdf]

Table S5. Comparison of clonogenicity and size of colony in parental cells (PCs) compared spheroid-derived cells (SDCs) before and after transfection

| Colony types | Mean number of cells±SD |                          |                         | <i>P</i> value | Mean colony size (µm)±SD |                          |                         | <i>P</i> value |
|--------------|-------------------------|--------------------------|-------------------------|----------------|--------------------------|--------------------------|-------------------------|----------------|
|              | PCs                     | SDCs before transfection | SDCs after transfection |                | PCs                      | SDCs before transfection | SDCs after transfection |                |
| Holoclone    | 36.6 ±10.2              | 73.0 ±4.5                | 28.6 ±5.1               | <0.05          | 1793.3 ±130              | 4501.6 ±172              | 1578.3 ±82.0            | <0.05          |
| Meroclone    | 32.3 ±3.5               | 45.3 ±6.1                | 22.3 ±3.21              |                | 1233.3 ±48.8             | 2852.6 ±41.5             | 1180.3 ±76.7            |                |
| Paraclone    | 16.3 ±0.5               | 34.0 ±1.7                | 15.6 ±6.4               |                | 884.6 ±71.1              | 1695.3 ±11.1             | 760.0 ±73.2             |                |

SD: Standard deviation
